# Supplementary material for: Optimizing biomass estimates of savanna woodland at different spatial scales in the Brazilian Cerrado: Re-evaluating allometric equations and environmental influences
Source: PLoS One. 2018 Aug 1;13(8):e0196742. doi: 10.1371/journal.pone.0196742 (PMC6070178; doi:10.1371/journal.pone.0196742)
Supplement: S5 Table — Bold values indicate significant differences in mean biomass between sites (P < 0.05; Kruskal–Wallis test). (XLSX) [file pone.0196742.s005.xlsx]

## Sheet: S2 Table 1 
	S1	S2	S3	S4	S5	S6	S7	S8	S9	S10	S11	S12	S13	S14	S15	S16	S17	S18	S19	S20	S21	S22	S23	S24	S25	S26	S27	S28	S29	S30	S31	S32	S33	S34	S35	S36	S37	S38	S39	S40	S41	S42	S43	S44	S45	S46	S47	S48	S49
S1		1	1	1	1	1	1	1	1	1	1	1	1	1	1	1	1	1	1	1	1	1	1	1	1	1	1	1	1	1	1	0.414902	1	1	1	0.000426523	1	1	1	1	1	0.274975	0.0338548	0.0234579	0.125907	0.426978	0.150873	0.0514444	0.140954
S2			1	1	1	1	1	1	1	1	1	1	1	1	1	1	1	1	1	1	1	1	1	1	1	1	0.220156	1	1	1	1	0.00226246	1	1	1	4.39388e-06	0.425854	0.212464	0.365043	1	0.440605	0.034136	3.50674e-05	5.10369e-05	0.0117353	0.0519077	0.0150339	0.00343284	0.0171091
S3				1	1	1	1	1	1	1	1	1	1	1	1	1	1	1	1	1	1	1	1	1	1	1	1	1	1	1	1	0.802183	1	1	1	0.000728256	1	1	1	1	1	0.612401	0.0538935	0.0386899	0.274594	0.954938	0.330758	0.109038	0.311483
S4					1	1	1	1	1	1	1	1	1	1	1	1	1	1	1	1	1	1	1	1	1	1	1	1	1	1	1	1	1	1	1	0.0131821	1	1	1	1	1	1	1	0.745921	1	1	1	0.945778	1
S5						1	1	1	1	1	1	1	1	1	1	1	1	1	1	1	1	1	1	1	1	1	1	1	1	1	1	1	1	1	1	0.0468244	1	1	1	1	1	1	1	1	1	1	1	1	1
S6							1	1	1	1	1	1	1	1	1	1	1	1	1	1	1	1	1	1	1	1	1	1	1	1	1	1	1	1	1	0.050314	1	1	1	1	1	1	1	1	1	1	1	1	1
S7								1	1	1	1	1	1	1	1	1	1	1	1	1	1	1	1	1	1	1	1	1	1	1	1	1	1	1	1	0.052567	1	1	1	1	1	1	1	1	1	1	1	1	1
S8									1	1	1	1	1	1	1	1	1	1	1	1	1	1	1	1	1	1	1	1	1	1	1	1	1	1	1	0.149187	1	1	1	1	1	1	1	1	1	1	1	1	1
S9										1	1	1	1	1	1	1	1	1	1	1	1	1	1	1	1	1	1	1	1	1	1	1	1	1	1	0.195438	1	1	1	1	1	1	1	1	1	1	1	1	1
S10											1	1	1	1	1	1	1	1	1	1	1	1	1	1	1	1	1	1	1	1	1	1	1	1	1	0.220902	1	1	1	1	1	1	1	1	1	1	1	1	1
S11												1	1	1	1	1	1	1	1	1	1	1	1	1	1	1	1	1	1	1	1	1	1	1	1	0.525383	1	1	1	1	1	1	1	1	1	1	1	1	1
S12													1	1	1	1	1	1	1	1	1	1	1	1	1	1	1	1	1	1	1	1	1	1	1	0.579651	1	1	1	1	1	1	1	1	1	1	1	1	1
S13														1	1	1	1	1	1	1	1	1	1	1	1	1	1	1	1	1	1	1	1	1	1	1	1	1	1	1	1	1	1	1	1	1	1	1	1
S14															1	1	1	1	1	1	1	1	1	1	1	1	1	1	1	1	1	1	1	1	1	1	1	1	1	1	1	1	1	1	1	1	1	1	1
S15																1	1	1	1	1	1	1	1	1	1	1	1	1	1	1	1	1	1	1	1	1	1	1	1	1	1	1	1	1	1	1	1	1	1
S16																	1	1	1	1	1	1	1	1	1	1	1	1	1	1	1	1	1	1	1	1	1	1	1	1	1	1	1	1	1	1	1	1	1
S17																		1	1	1	1	1	1	1	1	1	1	1	1	1	1	1	1	1	1	1	1	1	1	1	1	1	1	1	1	1	1	1	1
S18																			1	1	1	1	1	1	1	1	1	1	1	1	1	1	1	1	1	1	1	1	1	1	1	1	1	1	1	1	1	1	1
S19																				1	1	1	1	1	1	1	1	1	1	1	1	1	1	1	1	1	1	1	1	1	1	1	1	1	1	1	1	1	1
S20																					1	1	1	1	1	1	1	1	1	1	1	1	1	1	1	1	1	1	1	1	1	1	1	1	1	1	1	1	1
S21																						1	1	1	1	1	1	1	1	1	1	1	1	1	1	1	1	1	1	1	1	1	1	1	1	1	1	1	1
S22																							1	1	1	1	1	1	1	1	1	1	1	1	1	1	1	1	1	1	1	1	1	1	1	1	1	1	1
S23																								1	1	1	1	1	1	1	1	1	1	1	1	1	1	1	1	1	1	1	1	1	1	1	1	1	1
S24																									1	1	1	1	1	1	1	1	1	1	1	1	1	1	1	1	1	1	1	1	1	1	1	1	1
S25																										1	1	1	1	1	1	1	1	1	1	1	1	1	1	1	1	1	1	1	1	1	1	1	1
S26																											1	1	1	1	1	1	1	1	1	1	1	1	1	1	1	1	1	1	1	1	1	1	1
S27																												1	1	1	1	1	1	1	1	1	1	1	1	1	1	1	1	1	1	1	1	1	1
S28																													1	1	1	1	1	1	1	1	1	1	1	1	1	1	1	1	1	1	1	1	1
S29																														1	1	1	1	1	1	1	1	1	1	1	1	1	1	1	1	1	1	1	1
S30																															1	1	1	1	1	1	1	1	1	1	1	1	1	1	1	1	1	1	1
S31																																1	1	1	1	1	1	1	1	1	1	1	1	1	1	1	1	1	1
S32																																	1	1	1	1	1	1	1	1	1	1	1	1	1	1	1	1	1
S33																																		1	1	1	1	1	1	1	1	1	1	1	1	1	1	1	1
S34																																			1	1	1	1	1	1	1	1	1	1	1	1	1	1	1
S35																																				1	1	1	1	1	1	1	1	1	1	1	1	1	1
S36																																					1	1	1	1	1	1	1	1	1	1	1	1	1
S37																																						1	1	1	1	1	1	1	1	1	1	1	1
S38																																							1	1	1	1	1	1	1	1	1	1	1
S39																																								1	1	1	1	1	1	1	1	1	1
S40																																									1	1	1	1	1	1	1	1	1
S41																																										1	1	1	1	1	1	1	1
S42																																											1	1	1	1	1	1	1
S43																																												1	1	1	1	1	1
S44																																													1	1	1	1	1
S45																																														1	1	1	1
S46																																															1	1	1
S47																																																1	1
S48																																																	1
S49
S50
S51
S52
S53
S54
S55
S56
S57
S58
S59
S60
S61
S62
S63
S64
S65
S66
S67
S68
S69
S70
S71
S72
S73
S74
S75
S76
S77
[truncated: 28 more columns]
